# Supplementary material for: Followership styles scrutinized: temporal consistency and relationships with job attitudes and self-efficacy
Source: PeerJ journal article supplement (doi:10.7717/peerj.16135), 2023-10-27
Supplement: SM_1.pdf [file SM_1.pdf]

## Followership Styles Scrutinized: Temporal Consistency and Relationships with Job Attitudes and Self-efficacy.

### Supplemental Material 1. Testing For Measurement Equivalence.

In this SM1 we describe the procedures that we followed to test for measurement equivalence (ME). Following Geiser (2020), we consecutively tested ME models that differ by the level of ME (i.e., various parameter equality constraints) for every latent variable. First, we tested for configural invariance that specified the same number of factors and the same factor loading pattern across time. Second, we also constrained the factor loadings to remain the same for a given observed variable in addition to configural invariance (weak invariance). Subsequently, we tested for strong invariance (strong ME), which additionally set the intercepts to remain the same across time for a given observed variable. Finally, the strict invariance model (strict ME) additionally determined the measurement error variance to remain the same across time for a given variable.

#### Study 1

**Table 1**

*Measurement Equivalence of AE*

| Model         | $\chi^2$ | df  | p   | $\chi^2\Delta$ | df $\Delta$ | p( $\chi^2\Delta$ ) | RMSEA | CFI | SRMR | AIC    | BIC    |
|---------------|----------|-----|-----|----------------|-------------|---------------------|-------|-----|------|--------|--------|
| Configural ME | 432.44   | 167 | .00 |                |             |                     | .09   | .84 | .08  | 10,526 | 10,728 |
| Weak ME       | 438.34   | 176 | .00 | 14.90          | 9           | .094                | .09   | .84 | .08  | 10,514 | 10,687 |
| Strong ME     | 450.93   | 185 | .00 | 12.59          | 9           | .182                | .09   | .84 | .08  | 10,509 | 10,653 |
| Strict ME     | 476.55   | 195 | .00 | 25.62          | 10          | .005                | .09   | .83 | .11  | 10,515 | 10,626 |

*Note.*  $N = 184$ . RMSEA = Root Mean Square Error of Approximation; CFI = Comparative Fit Index; SRMR = Standardized Root Mean Square Residual; AIC = Akaike's Information Criterion; BIC = Bayesian Information Criterion.

**Table 2***Measurement Equivalence of ICT*

| <b>Model</b>  | $\chi^2$ | <b>df</b> | <b>p</b> | $\chi^2\Delta$ | <b>df<math>\Delta</math></b> | <b>p(<math>\chi^2\Delta</math>)</b> | <b>RMSEA</b> | <b>CFI</b> | <b>SRMR</b> | <b>AIC</b> | <b>BIC</b> |
|---------------|----------|-----------|----------|----------------|------------------------------|-------------------------------------|--------------|------------|-------------|------------|------------|
| Configural ME | 74.85    | 19        | .00      |                |                              |                                     | .13          | .80        | .07         | 4,677      | 4,757      |
| Weak ME       | 75.80    | 22        | .00      | 0.95           | 3                            | .813                                | .12          | .81        | .08         | 4,672      | 4,742      |
| Strong ME     | 76.44    | 25        | .00      | 0.64           | 3                            | .887                                | .11          | .82        | .08         | 4,666      | 4,727      |
| Strict ME     | 80.11    | 29        | .00      | 3.67           | 4                            | .453                                | .10          | .82        | .09         | 4,662      | 4,710      |

*Note.*  $N = 184$ . RMSEA = Root Mean Square Error of Approximation; CFI = Comparative Fit Index; SRMR = Standardized Root Mean Square Residual; AIC = Akaike's Information Criterion; BIC = Bayesian Information Criterion.

**Table 3***Measurement Equivalence of Job Satisfaction*

| <b>Model</b>  | $\chi^2$ | <b>df</b> | <b>p</b> | $\chi^2\Delta$ | <b>df<math>\Delta</math></b> | <b>p(<math>\chi^2\Delta</math>)</b> | <b>RMSEA</b> | <b>CFI</b> | <b>SRMR</b> | <b>AIC</b> | <b>BIC</b> |
|---------------|----------|-----------|----------|----------------|------------------------------|-------------------------------------|--------------|------------|-------------|------------|------------|
| Configural ME | 335.89   | 53        | .00      |                |                              |                                     | .17          | .80        | .08         | 6,668      | 6,787      |
| Weak ME       | 339.69   | 58        | .00      | 3.80           | 5                            | .579                                | .16          | .80        | .08         | 6,662      | 6,764      |
| Strong ME     | 344.43   | 63        | .00      | 4.74           | 5                            | .448                                | .16          | .80        | .08         | 6,657      | 6,743      |
| Strict ME     | 350.75   | 69        | .00      | 6.32           | 6                            | .388                                | .15          | .80        | .08         | 6,651      | 6,718      |

*Note.*  $N = 184$ . RMSEA = Root Mean Square Error of Approximation; CFI = Comparative Fit Index; SRMR = Standardized Root Mean Square Residual; AIC = Akaike's Information Criterion; BIC = Bayesian Information Criterion.

**Table 4***Measurement Equivalence of Organizational Commitment*

| <b>Model</b>  | $\chi^2$ | <b>df</b> | <b>p</b> | $\chi^2\Delta$ | <b>df<math>\Delta</math></b> | <b>p(<math>\chi^2\Delta</math>)</b> | <b>RMSEA</b> | <b>CFI</b> | <b>SRMR</b> | <b>AIC</b> | <b>BIC</b> |
|---------------|----------|-----------|----------|----------------|------------------------------|-------------------------------------|--------------|------------|-------------|------------|------------|
| Configural ME | 51.54    | 8         | .00      |                |                              |                                     | .17          | .90        | .04         | 3,530      | 3,591      |
| Weak ME       | 52.40    | 10        | .00      | 0.86           | 2                            | .651                                | .15          | .91        | .05         | 3,527      | 3,581      |
| Strong ME     | 55.90    | 12        | .00      | 3.50           | 2                            | .174                                | .14          | .90        | .05         | 3,526      | 3,574      |
| Strict ME     | 66.46    | 15        | .00      | 10.56          | 3                            | .014                                | .14          | .89        | .08         | 3,531      | 3,569      |

*Note.*  $N = 184$ . RMSEA = Root Mean Square Error of Approximation; CFI = Comparative Fit Index; SRMR = Standardized Root Mean Square Residual; AIC = Akaike's Information Criterion; BIC = Bayesian Information Criterion.

**Table 5***Measurement Equivalence of Self-Efficacy*

| <b>Model</b>  | $\chi^2$ | <b>df</b> | <b>p</b> | $\chi^2\Delta$ | <b>df</b> $\Delta$ | <b>p</b> ( $\chi^2\Delta$ ) | <b>RMSEA</b> | <b>CFI</b> | <b>SRMR</b> | <b>AIC</b> | <b>BIC</b> |
|---------------|----------|-----------|----------|----------------|--------------------|-----------------------------|--------------|------------|-------------|------------|------------|
| Configural ME | 309.53   | 53        | .00      |                |                    |                             | .16          | .80        | .07         | 5,892      | 6,010      |
| Weak ME       | 311.50   | 58        | .00      | 1.97           | 5                  | .853                        | .16          | .80        | .08         | 5,884      | 5,986      |
| Strong ME     | 314.73   | 63        | .00      | 3.23           | 5                  | .665                        | .15          | .80        | .08         | 5,877      | 5,963      |
| Strict ME     | 332.55   | 69        | .00      | 17.82          | 6                  | .007                        | .15          | .80        | .12         | 5,883      | 5,950      |

*Note.*  $N = 184$ . RMSEA = Root Mean Square Error of Approximation; CFI = Comparative Fit Index; SRMR = Standardized Root Mean Square Residual; AIC = Akaike's Information Criterion; BIC = Bayesian Information Criterion.

**Study 2****Table 6***Measurement Equivalence of AE*

| <b>Model</b>  | $\chi^2$ | <b>df</b> | <b>p</b> | $\chi^2\Delta$ | <b>df</b> $\Delta$ | <b>p</b> ( $\chi^2\Delta$ ) | <b>RMSEA</b> | <b>CFI</b> | <b>SRMR</b> | <b>AIC</b> | <b>BIC</b> |
|---------------|----------|-----------|----------|----------------|--------------------|-----------------------------|--------------|------------|-------------|------------|------------|
| Configural ME | 1345.4   | 167       | .00      |                |                    |                             | .11          | .83        | .06         | 32,728     | 33,000     |
| Weak ME       | 1354.5   | 176       | .00      | 9.1            | 9                  | .428                        | .11          | .83        | .07         | 32,719     | 32,953     |
| Strong ME     | 1363.1   | 185       | .00      | 8.6            | 9                  | .475                        | .11          | .83        | .07         | 32,710     | 32,904     |
| Strict ME     | 1370.0   | 195       | .00      | 6.9            | 10                 | .735                        | .10          | .83        | .07         | 32,696     | 32,848     |

*Note.*  $N = 570$ . RMSEA = Root Mean Square Error of Approximation; CFI = Comparative Fit Index; SRMR = Standardized Root Mean Square Residual; AIC = Akaike's Information Criterion; BIC = Bayesian Information Criterion.

**Table 7***Measurement Equivalence of ICT*

| Model         | $\chi^2$ | df | p   | $\chi^2\Delta$ | df $\Delta$ | $p(\chi^2\Delta)$ | RMSEA | CFI | SRMR | AIC    | BIC    |
|---------------|----------|----|-----|----------------|-------------|-------------------|-------|-----|------|--------|--------|
| Configural ME | 179.67   | 19 | .00 |                |             |                   | .12   | .87 | .05  | 14,396 | 14,504 |
| Weak ME       | 180.79   | 22 | .00 | 1.12           | 3           | .772              | .11   | .87 | .05  | 14,391 | 14,486 |
| Strong ME     | 184.09   | 25 | .00 | 3.30           | 3           | .348              | .11   | .87 | .06  | 14,388 | 14,470 |
| Strict ME     | 184.83   | 29 | .00 | 0.74           | 4           | .946              | .10   | .87 | .06  | 14,381 | 14,446 |

Note.  $N = 570$ . RMSEA = Root Mean Square Error of Approximation; CFI = Comparative Fit Index; SRMR = Standardized Root Mean Square Residual; AIC = Akaike's Information Criterion; BIC = Bayesian Information Criterion.

**Table 8***Measurement Equivalence of Job Satisfaction*

| Model         | $\chi^2$ | df | p   | $\chi^2\Delta$ | df $\Delta$ | $p(\chi^2\Delta)$ | RMSEA | CFI | SRMR | AIC    | BIC    |
|---------------|----------|----|-----|----------------|-------------|-------------------|-------|-----|------|--------|--------|
| Configural ME | 904.15   | 53 | .00 |                |             |                   | .17   | .83 | .06  | 18,485 | 18,645 |
| Weak ME       | 906.57   | 58 | .00 | 2.42           | 5           | .789              | .16   | .83 | .06  | 18,478 | 18,615 |
| Strong ME     | 911.56   | 63 | .00 | 4.99           | 5           | .417              | .16   | .83 | .06  | 18,473 | 18,589 |
| Strict ME     | 917.24   | 69 | .00 | 5.68           | 6           | .460              | .15   | .83 | .06  | 18,466 | 18,557 |

Note.  $N = 570$ . RMSEA = Root Mean Square Error of Approximation; CFI = Comparative Fit Index; SRMR = Standardized Root Mean Square Residual; AIC = Akaike's Information Criterion; BIC = Bayesian Information Criterion.

**Table 9***Measurement Equivalence of Organizational Commitment*

| Model         | $\chi^2$ | df | p   | $\chi^2\Delta$ | df $\Delta$ | $p(\chi^2\Delta)$ | RMSEA | CFI | SRMR | AIC    | BIC    |
|---------------|----------|----|-----|----------------|-------------|-------------------|-------|-----|------|--------|--------|
| Configural ME | 216.43   | 8  | .00 |                |             |                   | .22   | .88 | .06  | 10,832 | 10,913 |
| Weak ME       | 216.86   | 10 | .00 | 0.43           | 2           | .807              | .19   | .89 | .06  | 10,828 | 10,901 |
| Strong ME     | 220.67   | 12 | .00 | 3.81           | 2           | .149              | .18   | .88 | .06  | 10,828 | 10,892 |
| Strict ME     | 222.34   | 15 | .00 | 1.67           | 3           | .644              | .16   | .89 | .06  | 10,823 | 10,875 |

Note.  $N = 570$ . RMSEA = Root Mean Square Error of Approximation; CFI = Comparative Fit Index; SRMR = Standardized Root Mean Square Residual; AIC = Akaike's Information Criterion; BIC = Bayesian Information Criterion.

**Table 10***Measurement Equivalence of Self-Efficacy*

| <b>Model</b>  | <b><math>\chi^2</math></b> | <b>df</b> | <b>p</b> | <b><math>\chi^2\Delta</math></b> | <b>df<math>\Delta</math></b> | <b>p(<math>\chi^2\Delta</math>)</b> | <b>RMSEA</b> | <b>CFI</b> | <b>SRMR</b> | <b>AIC</b> | <b>BIC</b> |
|---------------|----------------------------|-----------|----------|----------------------------------|------------------------------|-------------------------------------|--------------|------------|-------------|------------|------------|
| Configural ME | 419.20                     | 53        | .00      |                                  |                              |                                     | .11          | .94        | .04         | 16,123     | 16,282     |
| Weak ME       | 421.26                     | 58        | .00      | 2.06                             | 5                            | .841                                | .11          | .94        | .04         | 16,115     | 16,253     |
| Strong ME     | 428.26                     | 63        | .00      | 7.00                             | 5                            | .221                                | .10          | .94        | .04         | 16,112     | 16,228     |
| Strict ME     | 442.40                     | 69        | .00      | 14.14                            | 6                            | .028                                | .10          | .93        | .05         | 16,114     | 16,204     |

*Note.*  $N = 570$ . RMSEA = Root Mean Square Error of Approximation; CFI = Comparative Fit Index; SRMR = Standardized Root Mean Square Residual; AIC = Akaike's Information Criterion; BIC = Bayesian Information Criterion.

**Reference:**

Geiser, C. (2020). *Longitudinal structural equation modeling with Mplus. A latent state-trait perspective*. Guilford.
