# Supplementary material for: Followership styles scrutinized: temporal consistency and relationships with job attitudes and self-efficacy
Source: PeerJ journal article supplement (doi:10.7717/peerj.16135), 2023-10-27
Supplement: SM_2.pdf [file SM_2.pdf]

## Followership Styles Scrutinized: Temporal Consistency and Relationships with Job Attitudes and Self-efficacy.

**Supplemental Material 2.** Distribution of AE and ICT mean values (at t1).

The distributions of the mean values for both followership scales were as follows:

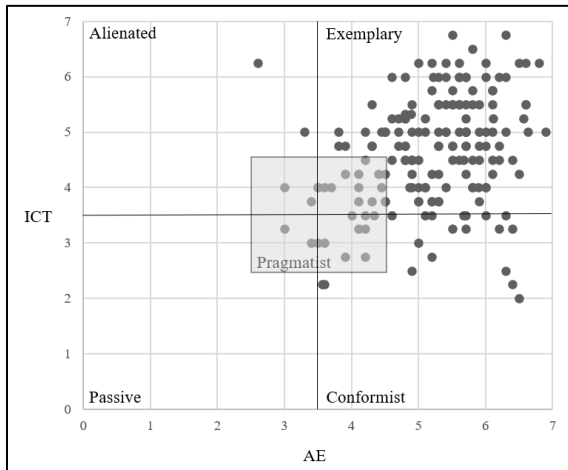

**Distribution of AE and ICT mean values for Study 1 (t1)**

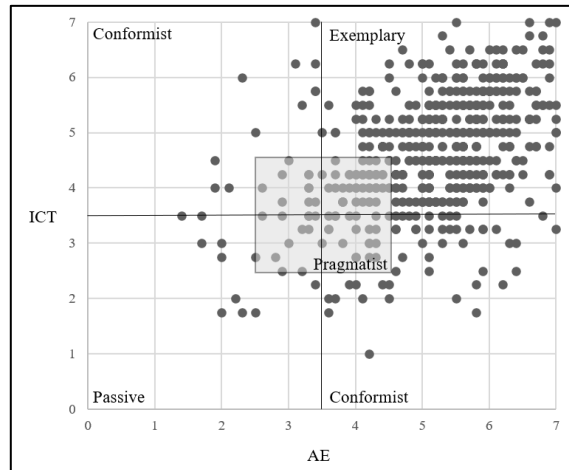

**Distribution of AE and ICT mean values for Study 2 (t1)**

We see that most participants in both studies adopted the pragmatist or exemplary followership style.
